# Supplementary material
Source: PubMed Central journal article supplement (PMC3992698)
Supplement: 1321437111_pnas.201321437SI.pdf [file 1321437111_pnas.201321437SI.pdf]

# Supporting Information

Fraser et al. 10.1073/pnas.1321437111

**Table S1. Best models found to explain variance in estimated species richness [determined by the Jackknife2 estimator ( $S_{jack2}$ )] in relation to whether a site was geothermal or not**

| Response                       | Predictors (sig)                                                                                        | <i>n</i> | % Dev explained | Distribution   | AIC (DIC) | Package  |
|--------------------------------|---------------------------------------------------------------------------------------------------------|----------|-----------------|----------------|-----------|----------|
| All geothermal sites           |                                                                                                         |          |                 |                |           |          |
| Plants                         | $ACBR_{REi}$ (+)log( $N_R$ )***; (+) $A_{IF}$ **; (+) $V_L$ ***                                         | 35       | 77              | Poisson (GH)   | 132       | lme4     |
| Inverts                        | $ACBR_{REi}$ (+)log( $N_R$ )***; (-) $H_{ASL}$ **                                                       | 18       | 74              | Poisson (MCMC) | (118)     | MCMCglmm |
| Fungi                          | $ACBR_{REi}$ log( $N_R$ )***; (+)log( $A_{IF}$ )***; - $H_{ASL}$ ***; (+) $V_S$                         | 42       | 79              | Poisson (GH)   | 245       | lme4     |
|                                | (+)log( $N_R$ )***; (-) $H_{ASL}$ *; (-) $R_R$ <sup>#</sup> ; s(lat,lon)***; (+) $V_S$ *                | 42       | 99              | Poisson (GAM)  | 339       | mgcv     |
| Antarctic Peninsula sites only |                                                                                                         |          |                 |                |           |          |
| Plants                         | $ACBR_{REi}$ (+)log( $N_R$ )***; (+) $V_S$ ; (+) $V_L$ ***                                              | 12       | 91              | Poisson (GH)   | 94        | lme4     |
| Inverts                        | $ACBR_{REi}$ (+)log( $N_R$ )***; (-) $H_{ASL}$ **                                                       | 10       | 98              | Poisson (GH)   | 10        | lme4     |
| Fungi                          | $ACBR_{REi}$ (+)log( $N_R$ )***; (-) $H_{ASL}$ *                                                        | 15       | 89              | Poisson (MCMC) | (131)     | MCMCglmm |
| Antarctic continent sites only |                                                                                                         |          |                 |                |           |          |
| Plants                         | $ACBR_{REi}$ (+)log( $N_R$ )***; (-) $H_{ASL}$ ***; (-) $R_R$ *; (+) $V_S$ *; (+) $V_L$ ***             | 15       | 88              | Poisson (GH)   | 45        | lme4     |
| Inverts                        | $ACBR_{REi}$ (+)log( $N_R$ ); (+) $H_{ASL}$ ***; (-) $R_R$ ***                                          | 6        | 97              | Poisson(GH)    | 11        | lme4     |
| Fungi                          | $ACBR_{REi}$ (+)log( $N_R$ )***; (-) $T_{DD}$ ***; (+)log( $A_{IF}$ )*; (+) $R_R$ **; (-) $H_{ASL}$ *** | 18       | 89              | Poisson (GH)   | 66        | lme4     |

Models were fitted to data from plants, invertebrates (Inverts), and fungi. Models were also fitted to data from the whole of Antarctica, the Antarctic Peninsula only, and continental Antarctica only. Geothermal sites were categorized as short-lived ( $V_S$ ) or long-lived ( $V_L$ ). Other predictors were as follows:  $ACBR_{REi}$ , Antarctic Conservation Biogeographic Regions as a random effect;  $A_{IF}$ , area of ice-free land (square kilometers);  $H_{ASL}$ , altitude above sea level (meters);  $N_R$ , number of records;  $R_R$ , rugosity as measured by the Terrain Roughness Index; s(lat,lon) (smoothed spatial covariate);  $T_{DD}$ , temperature as measured by degree days with a 5 °C threshold. Parameter details and data sources are provided in Table S7. Signs of model coefficients are shown in parentheses immediately preceding the predictor. Significance levels of predictors (sig) were assessed using Wald's Z statistic [Gaussian-Hermite (GH) and general additive models (GAMs)] and Markov Chain Monte Carlo (Bayesian p value, pMCMC; MCMCglmm) on the following scale: \*\*\* $P < 0.001$ ; \*\* $P < 0.01$ ; \* $P < 0.05$ ; # $P < 0.08$ . No significance symbol indicates that the predictor was in the best model [by Akaike information criterion (AIC)] but not significant by the Wald test. A log term was added to predictors on the basis of partial residual plots. Shading demonstrates evidence of geothermal effect (geothermal predictors present in the best model). DIC, deviance information criterion.

**Table S2. Best models found to explain variance in estimated  $S_{jack2}$  in relation to distance of nongeothermal site to nearest geothermal site**

| Response                       | Predictors (sig)                                                                                                    | <i>n</i> | % Dev explained | Distribution | AIC | Package |
|--------------------------------|---------------------------------------------------------------------------------------------------------------------|----------|-----------------|--------------|-----|---------|
| Antarctic Peninsula sites only |                                                                                                                     |          |                 |              |     |         |
| Plants                         | $ACBR_{REi}$ (+)log( $N_R$ )***; (-) $A_{IF}$ <sup>#</sup> ; (-) $R_R$ <sup>#</sup> ; (-) $T_{DDi}$ ; (-) $D_V$ *** | 12       | 89              | Poisson (GH) | 32  | lme4    |
| Inverts                        | $ACBR_{REi}$ (+)log( $N_R$ )***; (-) $H_{ASL}$ **                                                                   | 10       | 98              | Poisson (GH) | 10  | lme4    |
| Fungi                          | $ACBR_{REi}$ (+)log( $N_R$ )***; (+) $A_{IF}$ **; (-) $H_{ASL}$ ** <sup>#</sup> ; (-) $D_V$ *                       | 15       | 89              | Poisson (GH) | 36  | lme4    |
| Antarctic continent sites only |                                                                                                                     |          |                 |              |     |         |
| Plants                         | $ACBR_{REi}$ (+)log( $N_R$ )***; (-) $T_{DD}$ *; (+) $H_{ASL}$ <sup>#</sup> ; (-) $R_R$ ***; (-) $D_V$ *            | 15       | 85              | Poisson (GH) | 54  | lme4    |
| Inverts                        | $ACBR_{REi}$ (-) $R_R$ ***; (-) $D_V$ ***                                                                           | 6        | 89              | Poisson(GH)  | 12  | lme4    |
| Fungi                          | $ACBR_{REi}$ (+)log( $N_R$ )***; (-) $T_{DD}$ ***; (-) $H_{ASL}$ ***; (+) $R_R$ ** <sup>#</sup> ; (-) $D_V$ ***     | 18       | 86              | Poisson (GH) | 76  | lme4    |

Models were fitted to data from plants, invertebrates, and fungi. Models were also fitted to data from the whole of Antarctica, the Antarctic Peninsula only, and continental Antarctica only. Distance from nearest geothermal site was shown by  $D_V$ . Other predictors were  $ACBR_{REi}$ ,  $A_{IF}$ ,  $H_{ASL}$ ,  $N_R$ ,  $R_R$ , and  $T_{DD}$ . Parameter details and data sources are provided in Table S7. Signs of model coefficients are shown in parentheses immediately preceding the predictor. Significance levels of predictors were assessed using Wald's Z statistic (GH and GAMs) and pMCMC (MCMCglmm) on the following scale: \*\*\* $P < 0.001$ ; \*\* $P < 0.01$ ; \* $P < 0.05$ ; # $P < 0.08$ . No significance symbol indicates that the predictor was in the best model (by AIC) but not significant by the Wald test. A log term was added to predictors on the basis of partial residual plots. Shading demonstrates evidence of geothermal effect (geothermal predictors present in best the model).

**Table S3. Best models found to explain variance in observed species richness ( $S_{obs}$ ) in relation to whether a site was geothermal or not**

| Response                       | Predictors (sig)                                                                                     | <i>n</i> | % Dev explained | Distribution   | AIC (DIC) | Package  |
|--------------------------------|------------------------------------------------------------------------------------------------------|----------|-----------------|----------------|-----------|----------|
| All volcanoes                  |                                                                                                      |          |                 |                |           |          |
| Plants                         | $ACBR_{REi}$ ; (+)log( $N_R$ )***; (+) $A_{IF}$ *; (+) $V_S$ *; (+) $V_L$ ***                        | 35       | 81              | Poisson (GH)   | 95        | lme4     |
| Inverts                        | $ACBR_{REi}$ ; (+)log( $N_R$ )***; (-) $H_{ASL}$ **                                                  | 18       | 74              | Poisson (MCMC) | (106)     | MCMCglmm |
| Fungi                          | $ACBR_{REi}$ ; (+)log( $N_R$ )***; (+)log( $A_{IF}$ )**; (-) $H_{ASL}$ ***; (-) $R_R$ #; (+) $V_S$ * | 42       | 94              | Poisson (GH)   | 114       | lme4     |
|                                | log( $N_R$ )***; (-) $H_{ASL}$ **; (+) $V_S$ *; s(lat,lon)***                                        | 43       | 99              | Poisson (GAM)  | 302       | mgcv     |
| Antarctic Peninsula sites only |                                                                                                      |          |                 |                |           |          |
| Plants                         | $ACBR_{REi}$ ; (+)log( $N_R$ )***; (+) $V_S$ #; (+) $V_L$ *                                          | 12       | 97              | Poisson (GH)   | 15        | lme4     |
| Inverts                        | $ACBR_{REi}$ ; (+)log( $N_R$ )***                                                                    | 10       | 91              | Poisson (GH)   | 10        | lme4     |
| Fungi                          | $ACBR_{REi}$ ; (+)log( $N_R$ )***; (-) $H_{ASL}$ *                                                   | 15       | 92              | Poisson (MCMC) | (123)     | MCMCglmm |
| Antarctic continent sites only |                                                                                                      |          |                 |                |           |          |
| Plants                         | $ACBR_{REi}$ ; (+)log( $N_R$ ); (-) $R_R$ ***; (-) $H_{ASL}$ **; (+) $V_S$ *; (+) $V_L$ ***          | 15       | 90              | Poisson (GH)   | 32        | lme4     |
| Inverts                        | $ACBR_{REi}$ ; (+)log( $N_R$ ); (-) $T_{DD}$                                                         | 6        | 90              | Poisson(MCMC)  | (38)      | MCMCglmm |
| Fungi                          | $ACBR_{REi}$ ; (+)log( $N_R$ )***; (-) $T_{DD}$ **; (-) $R_R$ *; (+) $V_S$ *                         | 18       | 86              | Poisson (GH)   | 50        | lme4     |

Models were fitted to data from plants, invertebrates, and fungi. Models were also fitted to data from the whole of Antarctica, the Antarctic Peninsula only, and continental Antarctica only. Geothermal sites were categorized as  $V_S$  or  $V_L$ . Other predictors were  $ACBR_{REi}$ ,  $A_{IF}$ ,  $H_{ASL}$ ,  $N_R$ ,  $R_R$ , and  $T_{DD}$ . Parameter details and data sources are provided in Table S7. Signs of model coefficients are shown in brackets immediately preceding the predictor. Significance levels of predictors were assessed using Wald's Z statistic (GH and GAMs) and pMCMC (MCMCglmm) on the following scale: \*\*\* $P < 0.001$ ; \*\* $P < 0.01$ ; \* $P < 0.05$ ; # $P < 0.08$ . No significance symbol indicates that the predictor was in the best model (by AIC) but not significant by the Wald test. A log term was added to predictors on the basis of partial residual plots. Shading demonstrates evidence of geothermal effect (geothermal predictors present in best the model).

**Table S4. Best models found to explain variance in  $S_{obs}$  in relation to distance of nongeothermal site to nearest geothermal site**

| Response                       | Predictors                                                                                                 | <i>n</i> | % Dev explained | Distribution   | AIC (DIC) | Package  |
|--------------------------------|------------------------------------------------------------------------------------------------------------|----------|-----------------|----------------|-----------|----------|
| Antarctic Peninsula sites only |                                                                                                            |          |                 |                |           |          |
| Plants                         | $ACBR_{REi}$ ; (+)log( $N_R$ )***; (-) $D_V$ *                                                             | 12       | 96              | Poisson (MCMC) | (80)      | MCMCglmm |
| Inverts                        | $ACBR_{REi}$ ; (+)log( $N_R$ )***                                                                          | 10       | 91              | Poisson (GH)   | 10        | lme4     |
| Fungi                          | $ACBR_{REi}$ ; (+)log( $N_R$ )***; (-) $T_{DDi}$ ; (-) $H_{ASL}$ *; (-) $D_V$ **                           | 15       | 94              | Poisson (GH)   | 36        | lme4     |
| Antarctic continent sites only |                                                                                                            |          |                 |                |           |          |
| Plants                         | $ACBR_{REi}$ ; (+)log( $N_R$ )***; (-) $T_{DD}$ **; (-) $R_R$ *; (-) $D_V$ ***                             | 15       | 85              | Poisson (GH)   | 38        | lme4     |
| Inverts                        | $ACBR_{REi}$ ; (+)log( $N_R$ )***; (-) $T_{DD}$ *                                                          | 6        | 90              | Poisson(MCMC)  | (37.8)    | MCMCglmm |
| Fungi                          | $ACBR_{REi}$ ; (+)log( $N_R$ )***; (+) log( $A_{IF}$ )#; (-) $T_{DD}$ ***; (-) $H_{ASL}$ ***; (-) $D_V$ ** | 18       | 89              | Poisson (GH)   | 47        | lme4     |

Models were fitted to data from plants, invertebrates, and fungi. Models were also fitted to data from the whole of Antarctica, the Antarctic Peninsula only, and continental Antarctica only. Geothermal sites were categorized as  $V_S$  or  $V_L$ . Other predictors were  $ACBR_{REi}$ ,  $A_{IF}$ ,  $H_{ASL}$ ,  $N_R$ ,  $R_R$ , and  $T_{DD}$ . Parameter details and data sources are provided in Table S7. Signs of model coefficients are shown in brackets immediately preceding the predictor. Significance levels of predictors were assessed using Wald's Z statistic (GH and GAMs) and pMCMC (MCMCglmm) on the following scale: \*\*\* $P < 0.001$ ; \*\* $P < 0.01$ ; \* $P < 0.05$ ; # $P < 0.08$ . No significance symbol indicates that the predictor was in the best model (by AIC) but not significant by the Wald test. A log term was added to predictors on the basis of partial residual plots. Shading demonstrates evidence of geothermal effect (geothermal predictors present in best the model).

**Table S5. Number of records used in analyses**

|             | Plants       | Fungi        | Invertebrates |
|-------------|--------------|--------------|---------------|
| Antarctica  | 13,649 (429) | 15,159 (819) | 2,002 (134)   |
| Peninsula   | 7,486 (227)  | 7,310 (537)  | 1,753 (76)    |
| Continental | 6,163 (248)  | 7,849 (330)  | 249 (61)      |

Number of taxa are shown in parentheses.

**Table S6. Antarctic geothermal sites active since the Last Glacial Maximum**

| Classification | Name                          | Latitude | Longitude | Altitude of summit, m | Last known eruption                               |
|----------------|-------------------------------|----------|-----------|-----------------------|---------------------------------------------------|
| Small          | Paulet Island                 | -63.581  | -55.7707  | 353                   | Holocene                                          |
| Small          | Penguin Island                | -62.101  | -57.9174  | 180                   | 1905 (?)                                          |
| Small          | Seal Nunataks                 | -65.067  | -60.2842  | 368                   | 1980                                              |
| Small          | The Pleiades                  | -72.6722 | 165.4995  | 3,040                 | 1050 B.C. $\pm$ 1,000 y                           |
| Small          | Royal Society Range volcanoes | -78.252  | 163.5991  | 3,000                 | Holocene                                          |
| Large          | Deception Island              | -62.968  | -60.6505  | 576                   | 1987                                              |
| Large          | Mount Erebus                  | -77.5354 | 167.2825  | 3,794                 | 2012                                              |
| Large          | Mount Melbourne               | -74.3521 | 164.6994  | 2,732                 | 1750 $\pm$ 100 y                                  |
| Large          | Mount Rittman                 | -73.4667 | 165.6167  | 2,600                 | Uncertain, but warm ground indicates it is active |
| Large          | Broknes Peninsula*            | -69.3947 | 76.33494  | 0                     | N/A                                               |

\*The only nonvolcanic geothermal site in our analyses was the Broknes Peninsula in the Larsemann Hills. N/A, not applicable (no eruption possible).

**Table S7. Predictors used in models presented**

| Predictor                   | Type                      | Description                                                                                                                                                                                                                                |
|-----------------------------|---------------------------|--------------------------------------------------------------------------------------------------------------------------------------------------------------------------------------------------------------------------------------------|
| $ACBR_{FE}$                 | Categorical fixed effect  | Antarctic Conservation Biogeographic Region (1), fixed effect                                                                                                                                                                              |
| $ACBR_{RE}$                 | Categorical random effect | As above but as a random effect                                                                                                                                                                                                            |
| $T_{DD}$                    | Continuous                | Mean cumulative annual degree days, calculated using a $-5^{\circ}\text{C}$ threshold; degree days were derived from Modern Era Retrospective-analyses for Research and Applications (MERRA) data for 2012, interpolated to 50-km cells    |
| $H_{ASL}$                   | Continuous                | Mean height above sea level, calculated from 200 m pixels of Radarsat Antarctic Mapping Project Digital Elevation Model Version 2 (RAMP DEM) ( <a href="http://nsidc.org/data/nsidc-0082.html">http://nsidc.org/data/nsidc-0082.html</a> ) |
| $A_{IF}$                    | Continuous                | Area of ice-free land in each site                                                                                                                                                                                                         |
| $N_R$                       | Continuous                | Number of records                                                                                                                                                                                                                          |
| $R_R$                       | Continuous                | Rugosity: based on the Terrain Roughness Index, from variation in altitude between one 200-m pixel in RAMP DEM and surrounding pixels                                                                                                      |
| $s(\text{lat}, \text{lon})$ | Bivariate smooth          | Smoothed location covariate based on the latitude and longitude of the geothermal or nongeothermal location; only used in generalized additive models                                                                                      |
| $D_V$                       | Continuous                | Distance from geothermal site: distance of nongeothermal location to edge of nearest geothermal 100-km radius buffer                                                                                                                       |
| $V_S$                       | Binary categorical        | Small geothermal site: volcano with sporadic activity and a small magma chamber                                                                                                                                                            |
| $V_L$                       | Binary categorical        | Large geothermal site: volcano with a large magma chamber and extended periods of activity or a nonvolcanic geothermal site with slow radiogenic decay of rocks (in the case of the Larsemann Hills)                                       |

Site refers to a 100-km radius circle around each geothermal or nongeothermal location.

1. Terauds A, et al. (2012) Conservation biogeography of the Antarctic. *Divers Distrib* 18(7):726–741.
